# Supplementary material
Source: MDPI journal article supplement (https://www.mdpi.com/2304-6740/1/1/70)
Supplement: s1 [file s1]

 
data_C6H13

_audit_creation_method           SHELXL-97
_chemical_name_systematic        ?
_chemical_name_common            ?
_chemical_formula_moiety         'C12 H17 N2 , Au Cl4'
_chemical_formula_sum            'C12 H17 Au Cl4 N2'
_chemical_melting_point          ?

_exptl_crystal_description       needle
_exptl_crystal_colour            yellow

_diffrn_ambient_temperature      173(2)
_chemical_formula_weight         528.04

loop_
_atom_type_symbol
_atom_type_description
_atom_type_scat_dispersion_real
_atom_type_scat_dispersion_imag
_atom_type_scat_source
C C 0.0181 0.0091 'International Tables Vol C Tables 4.2.6.8 and 6.1.1.4'
H H 0.0000 0.0000 'International Tables Vol C Tables 4.2.6.8 and 6.1.1.4'
N N 0.0311 0.0180 'International Tables Vol C Tables 4.2.6.8 and 6.1.1.4'
Cl Cl 0.3639 0.7018 'International Tables Vol C Tables 4.2.6.8 and 6.1.1.4'
Au Au -4.4197 7.2980 'International Tables Vol C Tables 4.2.6.8 and 6.1.1.4'

_symmetry_cell_setting           monoclinic
_symmetry_space_group_name_H-M   'P 21/c'
_symmetry_int_tables_number      14
_chemical_absolute_configuration ?

loop_
_symmetry_equiv_pos_as_xyz
'x, y, z'
'-x, y+1/2, -z+1/2'
'-x, -y, -z'
'x, -y-1/2, z-1/2'

_cell_length_a                   15.5144(3)
_cell_length_b                   38.4270(8)
_cell_length_c                   8.7773(2)
_cell_angle_alpha                90.00
_cell_angle_beta                 90.0250(10)
_cell_angle_gamma                90.00
_cell_volume                     5232.78(19)
_cell_formula_units_Z            12
_cell_measurement_temperature    173(2)
_cell_measurement_reflns_used    9157
_cell_measurement_theta_min      5.17
_cell_measurement_theta_max      67.51
_exptl_crystal_size_max          0.312
_exptl_crystal_size_mid          0.085
_exptl_crystal_size_min          0.033
_exptl_crystal_density_meas      ?
_exptl_crystal_density_diffrn    2.011
_exptl_crystal_density_method    'not measured'
_exptl_crystal_F_000             3000
_exptl_absorpt_coefficient_mu    21.395

_exptl_absorpt_correction_type   Multi-scan
_exptl_absorpt_correction_T_min  0.169
_exptl_absorpt_correction_T_max  0.494
_exptl_absorpt_process_details   SADABS
_exptl_special_details           
;
Data was collected using a BRUKER CCD (charge coupled device) based
diffractometer equipped with an Oxford low-temperature apparatus operating at
173 K.  A suitable crystal was chosen and mounted on a glass fiber or nylon loop
using Paratone oil for Mo radiation and Mineral oil for Copper radiation.  Data 
were measured using omega and Phi scans of 1.0\% per frame 
for 30 s. The total number of images were based on 
results from the program COSMO where redundancy was expected to be 4 and 
completeness to 0.83 to 100%. Cell parameters were
retrieved using APEX II software and refined using SAINT on all observed
reflections. Data reduction was performed using the SAINT software which
corrects for Lp and decay. Scaling and absorption corrections were performed 
by the SADABS program.  The structures are solved by the direct method
using the SHELX-90 program and refined by least squares method on F2 SHELXL-93,
incorporated in SHELXTL V6.1.
 
All H atoms were placed in calculated positions and refined using a riding
model.
C-H(aromatic) = 0.94  \%A and Uiso(H) = 1.2Ueq(C)
C-H (alaphatic) = 0.99 \%A and Uiso(H) = 1.2Ueq(C)
CH2 = 0.98 \%A and Uiso(H) = 1.2Ueq(C)
CH3 = 0.97\%A and Uiso(H) = 1.5Ueq(C)
N-H = 0.86 (0.92)\%A and Uiso(H) = 1.2 Ueq(N)
O-H(alcohol) = 0.85\%Aand Uiso(H) = 1.2Ueq(O)
O-H(acid) = 0.82\%A and Uiso(H) = 1.5Ueq(O)
;
_diffrn_radiation_probe          x-ray
_diffrn_radiation_type           CuK\a
_diffrn_radiation_wavelength     1.54178
_diffrn_source                   'fine-focus sealed tube'
_diffrn_radiation_monochromator  graphite
_diffrn_measurement_device_type  'Bruker APEX-II CCD'
_diffrn_measurement_method       '\w,and/f 0.5 deg'
_diffrn_detector_area_resol_mean 836.6
_diffrn_reflns_number            39593
_diffrn_reflns_av_R_equivalents  0.0497
_diffrn_reflns_av_sigmaI/netI    0.0481
_diffrn_reflns_limit_h_min       -18
_diffrn_reflns_limit_h_max       18
_diffrn_reflns_limit_k_min       -46
_diffrn_reflns_limit_k_max       46
_diffrn_reflns_limit_l_min       -10
_diffrn_reflns_limit_l_max       10
_diffrn_reflns_theta_min         3.07
_diffrn_reflns_theta_max         67.95
_reflns_number_total             9393
_reflns_number_gt                8697
_reflns_threshold_expression     >2sigma(I)

_computing_data_collection       'COSMO (BRUKER, V1.61, 2009)'
_computing_cell_refinement       'APEX2 (BRUKER, V2010.11-3, 2010)'
_computing_data_reduction        'SAINT (BRUKER, V7.68A, 2010)'
_computing_structure_solution    
'SHELXS (Sheldrick, Acta Cryst. A64 2008, 112-122)'
_computing_structure_refinement  
'SHELXL (Sheldrick, Acta Cryst. A64 2008, 112-122)'
_computing_molecular_graphics    
'SHELXTL (Sheldrick, Acta Cryst. A64 2008, 112-122)'
_computing_publication_material  
'SHELXTL (Sheldrick, Acta Cryst. A64 2008, 112-122)'

_refine_special_details          
; 
 Refinement of F^2^ against ALL reflections.  The weighted R-factor wR and 
 goodness of fit S are based on F^2^, conventional R-factors R are based 
 on F, with F set to zero for negative F^2^. The threshold expression of 
 F^2^ > 2sigma(F^2^) is used only for calculating R-factors(gt) etc. and is 
 not relevant to the choice of reflections for refinement.  R-factors based 
 on F^2^ are statistically about twice as large as those based on F, and R- 
 factors based on ALL data will be even larger. 
;

_refine_ls_structure_factor_coef Fsqd
_refine_ls_matrix_type           full
_refine_ls_weighting_scheme      calc
_refine_ls_weighting_details     
'calc w=1/[\s^2^(Fo^2^)+(0.0704P)^2^+83.8976P] where P=(Fo^2^+2Fc^2^)/3'
_atom_sites_solution_primary     direct
_atom_sites_solution_secondary   difmap
_atom_sites_solution_hydrogens   geom
_refine_ls_hydrogen_treatment    constr
_refine_ls_extinction_method     none
_refine_ls_extinction_coef       ?
_refine_ls_number_reflns         9393
_refine_ls_number_parameters     511
_refine_ls_number_restraints     0
_refine_ls_R_factor_all          0.0603
_refine_ls_R_factor_gt           0.0568
_refine_ls_wR_factor_ref         0.1556
_refine_ls_wR_factor_gt          0.1530
_refine_ls_goodness_of_fit_ref   1.061
_refine_ls_restrained_S_all      1.061
_refine_ls_shift/su_max          0.003
_refine_ls_shift/su_mean         0.000

loop_
_atom_site_label
_atom_site_type_symbol
_atom_site_fract_x
_atom_site_fract_y
_atom_site_fract_z
_atom_site_U_iso_or_equiv
_atom_site_adp_type
_atom_site_occupancy
_atom_site_symmetry_multiplicity
_atom_site_calc_flag
_atom_site_refinement_flags
_atom_site_disorder_assembly
_atom_site_disorder_group
Au1 Au 0.14044(2) 0.065399(9) 0.28083(4) 0.03401(9) Uani 1 1 d . . .
Au2 Au 0.19662(2) 0.199298(8) 0.96606(4) 0.02909(8) Uani 1 1 d . . .
Au3 Au 0.30522(2) 0.795775(9) 0.05029(4) 0.03009(8) Uani 1 1 d . . .
Cl1 Cl 0.17092(19) 0.10691(6) 0.1044(3) 0.0532(6) Uani 1 1 d . . .
Cl2 Cl 0.0891(2) 0.02861(7) 0.0980(3) 0.0647(8) Uani 1 1 d . . .
Cl3 Cl 0.1120(2) 0.02355(6) 0.4568(3) 0.0585(7) Uani 1 1 d . . .
Cl4 Cl 0.18789(17) 0.10196(6) 0.4669(3) 0.0483(6) Uani 1 1 d . . .
Cl5 Cl 0.20189(13) 0.16419(5) 0.7577(2) 0.0374(5) Uani 1 1 d . . .
Cl6 Cl 0.34302(15) 0.20019(7) 0.9694(4) 0.0570(7) Uani 1 1 d . . .
Cl7 Cl 0.19225(17) 0.23539(7) 1.1726(3) 0.0575(7) Uani 1 1 d . . .
Cl8 Cl 0.05021(12) 0.19730(5) 0.9609(3) 0.0362(5) Uani 1 1 d . . .
Cl9 Cl 0.30767(18) 0.74943(7) 0.2120(3) 0.0594(7) Uani 1 1 d . . .
Cl10 Cl 0.15820(13) 0.79451(5) 0.0494(3) 0.0417(5) Uani 1 1 d . . .
Cl11 Cl 0.30276(14) 0.84376(6) -0.1030(3) 0.0438(5) Uani 1 1 d . . .
Cl12 Cl 0.45107(14) 0.79699(7) 0.0482(3) 0.0493(6) Uani 1 1 d . . .
N1 N -0.1757(6) 0.9427(2) 0.2103(10) 0.052(2) Uani 1 1 d . . .
N2 N -0.1099(5) 0.9339(2) 0.2245(9) 0.0385(18) Uani 1 1 d . . .
C1 C -0.0241(6) 0.9220(2) 0.2373(10) 0.037(2) Uani 1 1 d . . .
C2 C -0.0078(7) 0.8873(2) 0.2130(12) 0.048(3) Uani 1 1 d . . .
H2 H -0.0525 0.8718 0.1841 0.058 Uiso 1 1 calc R . .
C3 C 0.0727(7) 0.8763(2) 0.2314(13) 0.047(3) Uani 1 1 d . . .
H3 H 0.0856 0.8524 0.2142 0.057 Uiso 1 1 calc R . .
C4 C 0.1382(6) 0.8986(3) 0.2751(12) 0.044(2) Uani 1 1 d . . .
C5 C 0.1209(6) 0.9337(3) 0.2921(13) 0.050(3) Uani 1 1 d . . .
H5 H 0.1663 0.9492 0.3181 0.061 Uiso 1 1 calc R . .
C6 C 0.0382(6) 0.9464(3) 0.2718(12) 0.045(2) Uani 1 1 d . . .
H6 H 0.0251 0.9705 0.2810 0.054 Uiso 1 1 calc R . .
C7 C 0.2283(7) 0.8836(3) 0.3077(16) 0.060(3) Uani 1 1 d . . .
H7A H 0.2343 0.8801 0.4190 0.072 Uiso 1 1 calc R . .
H7B H 0.2326 0.8604 0.2588 0.072 Uiso 1 1 calc R . .
C8 C 0.2996(8) 0.9048(3) 0.2553(16) 0.063(3) Uani 1 1 d . . .
H8A H 0.2989 0.9273 0.3104 0.076 Uiso 1 1 calc R . .
H8B H 0.2921 0.9098 0.1454 0.076 Uiso 1 1 calc R . .
C9 C 0.3875(7) 0.8870(3) 0.2800(15) 0.060(3) Uani 1 1 d . . .
H9A H 0.3932 0.8814 0.3896 0.072 Uiso 1 1 calc R . .
H9B H 0.3875 0.8648 0.2233 0.072 Uiso 1 1 calc R . .
C10 C 0.4644(8) 0.9071(3) 0.2336(18) 0.071(4) Uani 1 1 d . . .
H10A H 0.4684 0.9281 0.2982 0.085 Uiso 1 1 calc R . .
H10B H 0.4565 0.9149 0.1270 0.085 Uiso 1 1 calc R . .
C11 C 0.5489(7) 0.8872(3) 0.2448(16) 0.061(3) Uani 1 1 d . . .
H11A H 0.5542 0.8773 0.3485 0.073 Uiso 1 1 calc R . .
H11B H 0.5476 0.8676 0.1718 0.073 Uiso 1 1 calc R . .
C12 C 0.6272(9) 0.9094(4) 0.212(2) 0.088(5) Uani 1 1 d . . .
H12A H 0.6206 0.9207 0.1127 0.132 Uiso 1 1 calc R . .
H12B H 0.6788 0.8947 0.2114 0.132 Uiso 1 1 calc R . .
H12C H 0.6330 0.9273 0.2915 0.132 Uiso 1 1 calc R . .
N1A N 0.0294(7) 0.7581(2) -0.2413(10) 0.055(2) Uani 1 1 d . . .
N2A N 0.0360(5) 0.73678(19) -0.1608(9) 0.0382(18) Uani 1 1 d . . .
C1A C 0.0441(6) 0.7098(2) -0.0544(10) 0.036(2) Uani 1 1 d . . .
C2A C -0.0311(6) 0.6930(2) -0.0055(12) 0.041(2) Uani 1 1 d . . .
H2A H -0.0862 0.6985 -0.0457 0.050 Uiso 1 1 calc R . .
C3A C -0.0198(6) 0.6681(2) 0.1037(11) 0.041(2) Uani 1 1 d . . .
H3A H -0.0690 0.6562 0.1413 0.050 Uiso 1 1 calc R . .
C4A C 0.0592(6) 0.6597(2) 0.1611(10) 0.035(2) Uani 1 1 d . . .
C5A C 0.1317(6) 0.6772(2) 0.1102(11) 0.040(2) Uani 1 1 d . . .
H5A H 0.1864 0.6717 0.1527 0.048 Uiso 1 1 calc R . .
C6A C 0.1265(5) 0.7021(2) 0.0014(12) 0.037(2) Uani 1 1 d . . .
H6A H 0.1763 0.7138 -0.0352 0.044 Uiso 1 1 calc R . .
C7A C 0.0696(6) 0.6324(2) 0.2831(12) 0.043(2) Uani 1 1 d . . .
H7A1 H 0.0124 0.6268 0.3268 0.051 Uiso 1 1 calc R . .
H7A2 H 0.1062 0.6417 0.3660 0.051 Uiso 1 1 calc R . .
C8A C 0.1101(8) 0.5993(3) 0.2211(13) 0.056(3) Uani 1 1 d . . .
H8A1 H 0.0688 0.5879 0.1511 0.067 Uiso 1 1 calc R . .
H8A2 H 0.1620 0.6055 0.1614 0.067 Uiso 1 1 calc R . .
C9A C 0.1354(9) 0.5737(3) 0.3448(15) 0.063(3) Uani 1 1 d . . .
H9A1 H 0.1749 0.5855 0.4169 0.076 Uiso 1 1 calc R . .
H9A2 H 0.0831 0.5670 0.4022 0.076 Uiso 1 1 calc R . .
C10A C 0.1783(10) 0.5414(3) 0.2877(19) 0.080(4) Uani 1 1 d . . .
H10C H 0.1416 0.5306 0.2082 0.096 Uiso 1 1 calc R . .
H10D H 0.1836 0.5246 0.3726 0.096 Uiso 1 1 calc R . .
C11A C 0.2698(13) 0.5484(5) 0.220(3) 0.121(7) Uani 1 1 d . . .
H11C H 0.2644 0.5650 0.1340 0.145 Uiso 1 1 calc R . .
H11D H 0.3062 0.5595 0.2988 0.145 Uiso 1 1 calc R . .
C12A C 0.3130(15) 0.5167(6) 0.165(4) 0.161(11) Uani 1 1 d . . .
H12D H 0.3320 0.5028 0.2527 0.241 Uiso 1 1 calc R . .
H12E H 0.3631 0.5231 0.1033 0.241 Uiso 1 1 calc R . .
H12F H 0.2727 0.5031 0.1034 0.241 Uiso 1 1 calc R . .
N1B N 0.4333(10) 0.2439(3) 1.2382(12) 0.090(4) Uani 1 1 d . . .
N2B N 0.4355(7) 0.2650(3) 1.1572(10) 0.060(3) Uani 1 1 d . . .
C1B C 0.4377(7) 0.2913(3) 1.0485(11) 0.050(3) Uani 1 1 d . . .
C2B C 0.5173(8) 0.3015(3) 0.9988(14) 0.058(3) Uani 1 1 d . . .
H2B H 0.5691 0.2919 1.0386 0.070 Uiso 1 1 calc R . .
C3B C 0.5168(8) 0.3269(3) 0.8854(14) 0.058(3) Uani 1 1 d . . .
H3B H 0.5703 0.3342 0.8436 0.070 Uiso 1 1 calc R . .
C4B C 0.4424(8) 0.3417(3) 0.8316(13) 0.058(3) Uani 1 1 d . B .
C5B C 0.3640(8) 0.3300(3) 0.8891(16) 0.069(4) Uani 1 1 d . . .
H5B H 0.3120 0.3400 0.8521 0.083 Uiso 1 1 calc R . .
C6B C 0.3601(7) 0.3046(3) 0.9968(16) 0.062(3) Uani 1 1 d . . .
H6B H 0.3065 0.2964 1.0349 0.075 Uiso 1 1 calc R . .
C7B C 0.4462(13) 0.3701(3) 0.7148(19) 0.095(5) Uani 1 1 d . . .
H7B1 H 0.3868 0.3739 0.6772 0.114 Uiso 1 1 calc R A 1
H7B2 H 0.4803 0.3612 0.6278 0.114 Uiso 1 1 calc R A 1
C8B C 0.483(2) 0.4062(9) 0.757(4) 0.097(10) Uiso 0.50 1 d P B 1
H8BA H 0.5356 0.4029 0.8196 0.116 Uiso 0.50 1 calc PR B 1
H8BB H 0.5007 0.4183 0.6619 0.116 Uiso 0.50 1 calc PR B 1
C9B C 0.422(4) 0.4282(17) 0.840(8) 0.18(2) Uiso 0.50 1 d P B 1
H9BA H 0.3650 0.4197 0.8071 0.212 Uiso 0.50 1 calc PR B 1
H9BB H 0.4284 0.4207 0.9473 0.212 Uiso 0.50 1 calc PR B 1
C10B C 0.412(3) 0.4645(10) 0.850(5) 0.100(11) Uiso 0.50 1 d P B 1
H10E H 0.3558 0.4671 0.9028 0.120 Uiso 0.50 1 calc PR B 1
H10F H 0.4558 0.4715 0.9257 0.120 Uiso 0.50 1 calc PR B 1
C11B C 0.412(4) 0.4907(16) 0.751(7) 0.16(2) Uiso 0.50 1 d P B 1
H11E H 0.4198 0.5099 0.8248 0.192 Uiso 0.50 1 calc PR B 1
H11F H 0.3495 0.4911 0.7288 0.192 Uiso 0.50 1 calc PR B 1
C12B C 0.447(5) 0.513(2) 0.587(8) 0.22(2) Uiso 0.50 1 d P B 1
H12G H 0.4165 0.5352 0.5791 0.331 Uiso 0.50 1 calc PR B 1
H12H H 0.4351 0.4988 0.4969 0.331 Uiso 0.50 1 calc PR B 1
H12I H 0.5092 0.5172 0.5946 0.331 Uiso 0.50 1 calc PR B 1
C8C C 0.429(2) 0.4030(7) 0.810(3) 0.071(7) Uiso 0.50 1 d P B 2
H8CA H 0.4796 0.4071 0.8771 0.085 Uiso 0.50 1 calc PR B 2
H8CB H 0.3786 0.3989 0.8755 0.085 Uiso 0.50 1 calc PR B 2
C9C C 0.413(2) 0.4362(8) 0.713(4) 0.079(8) Uiso 0.50 1 d P B 2
H9CA H 0.4639 0.4389 0.6455 0.095 Uiso 0.50 1 calc PR B 2
H9CB H 0.3635 0.4311 0.6462 0.095 Uiso 0.50 1 calc PR B 2
C10C C 0.399(6) 0.467(2) 0.775(10) 0.21(3) Uiso 0.50 1 d P B 2
H10G H 0.4549 0.4764 0.8081 0.249 Uiso 0.50 1 calc PR B 2
H10H H 0.3636 0.4632 0.8672 0.249 Uiso 0.50 1 calc PR B 2
C11C C 0.349(3) 0.4978(12) 0.666(5) 0.115(13) Uiso 0.50 1 d P B 2
H11G H 0.3009 0.5070 0.7284 0.137 Uiso 0.50 1 calc PR B 2
H11H H 0.3907 0.5171 0.6544 0.137 Uiso 0.50 1 calc PR B 2
C12C C 0.330(5) 0.494(2) 0.585(9) 0.22(2) Uiso 0.50 1 d P B 2
H12J H 0.3036 0.5155 0.5452 0.331 Uiso 0.50 1 calc PR B 2
H12K H 0.2863 0.4758 0.5915 0.331 Uiso 0.50 1 calc PR B 2
H12L H 0.3764 0.4867 0.5166 0.331 Uiso 0.50 1 calc PR B 2

loop_
_atom_site_aniso_label
_atom_site_aniso_U_11
_atom_site_aniso_U_22
_atom_site_aniso_U_33
_atom_site_aniso_U_23
_atom_site_aniso_U_13
_atom_site_aniso_U_12
Au1 0.03803(19) 0.02877(17) 0.03522(18) 0.00077(14) 0.00135(15) -0.00025(13)
Au2 0.02022(15) 0.02946(16) 0.03758(18) -0.00286(13) -0.00248(14) -0.00173(12)
Au3 0.02156(16) 0.03220(17) 0.03652(18) 0.00017(13) -0.00109(14) 0.00010(12)
Cl1 0.0733(16) 0.0410(12) 0.0453(13) 0.0113(10) -0.0005(12) -0.0073(11)
Cl2 0.106(2) 0.0472(13) 0.0414(13) 0.0004(11) -0.0071(14) -0.0217(14)
Cl3 0.099(2) 0.0360(11) 0.0405(12) -0.0010(10) 0.0058(13) -0.0167(12)
Cl4 0.0634(14) 0.0372(11) 0.0443(12) -0.0014(9) -0.0030(11) -0.0103(10)
Cl5 0.0330(10) 0.0387(10) 0.0405(11) -0.0066(9) 0.0021(9) -0.0013(8)
Cl6 0.0241(10) 0.0757(17) 0.0713(17) -0.0169(13) -0.0067(11) -0.0055(10)
Cl7 0.0451(13) 0.0632(14) 0.0643(15) -0.0325(12) -0.0025(12) -0.0042(11)
Cl8 0.0171(8) 0.0423(10) 0.0491(12) -0.0070(9) -0.0009(8) 0.0023(7)
Cl9 0.0531(14) 0.0590(14) 0.0660(16) 0.0259(13) 0.0004(12) 0.0028(12)
Cl10 0.0253(10) 0.0362(10) 0.0637(14) -0.0016(10) 0.0036(10) -0.0016(8)
Cl11 0.0359(10) 0.0401(11) 0.0553(13) 0.0099(10) -0.0029(10) -0.0035(9)
Cl12 0.0182(9) 0.0601(14) 0.0696(16) 0.0069(12) -0.0038(10) -0.0003(9)
N1 0.046(5) 0.062(5) 0.048(5) -0.004(4) 0.000(4) -0.006(4)
N2 0.033(4) 0.047(4) 0.035(4) 0.002(3) 0.002(3) -0.004(3)
C1 0.043(5) 0.034(4) 0.035(4) -0.001(4) 0.006(4) -0.005(4)
C2 0.064(6) 0.034(5) 0.047(6) -0.006(4) 0.001(5) -0.010(4)
C3 0.053(6) 0.031(4) 0.058(6) -0.003(4) 0.001(5) -0.005(4)
C4 0.043(5) 0.043(5) 0.046(5) -0.008(4) 0.002(4) -0.001(4)
C5 0.030(5) 0.053(6) 0.068(7) -0.025(5) 0.004(5) -0.016(4)
C6 0.041(5) 0.038(5) 0.055(6) -0.012(4) -0.003(4) -0.004(4)
C7 0.044(6) 0.048(6) 0.087(9) 0.004(6) 0.010(6) 0.005(5)
C8 0.054(6) 0.057(6) 0.079(8) 0.008(6) -0.006(6) 0.005(5)
C9 0.046(6) 0.069(7) 0.064(7) 0.000(6) 0.000(5) 0.011(5)
C10 0.052(7) 0.062(7) 0.098(10) 0.018(7) 0.001(7) 0.007(6)
C11 0.049(6) 0.061(7) 0.072(8) -0.001(6) -0.001(6) 0.010(5)
C12 0.062(8) 0.076(9) 0.127(13) 0.029(9) 0.004(9) 0.003(7)
N1A 0.083(6) 0.039(4) 0.043(5) 0.004(4) 0.002(5) 0.013(4)
N2A 0.046(4) 0.034(4) 0.034(4) -0.006(3) -0.001(3) 0.004(3)
C1A 0.051(5) 0.026(4) 0.030(4) -0.002(3) -0.002(4) 0.001(4)
C2A 0.037(5) 0.032(4) 0.055(6) -0.002(4) -0.012(4) -0.008(4)
C3A 0.044(5) 0.042(5) 0.038(5) -0.008(4) 0.001(4) -0.016(4)
C4A 0.035(4) 0.032(4) 0.038(4) -0.007(4) 0.004(4) -0.011(3)
C5A 0.029(4) 0.041(5) 0.050(5) 0.006(4) -0.007(4) 0.010(4)
C6A 0.019(4) 0.030(4) 0.061(6) -0.004(4) 0.005(4) -0.001(3)
C7A 0.042(5) 0.039(5) 0.048(5) 0.007(4) 0.003(4) -0.007(4)
C8A 0.074(7) 0.042(5) 0.052(6) 0.005(5) 0.015(6) 0.001(5)
C9A 0.079(8) 0.042(5) 0.069(7) 0.016(5) 0.011(6) 0.004(5)
C10A 0.099(10) 0.051(7) 0.091(10) 0.015(7) 0.005(9) 0.015(7)
C11A 0.128(14) 0.091(11) 0.143(17) 0.027(11) 0.050(13) 0.047(10)
C12A 0.114(16) 0.119(17) 0.25(3) -0.011(19) 0.027(19) 0.036(14)
N1B 0.143(11) 0.080(7) 0.046(6) -0.013(5) 0.005(7) -0.049(7)
N2B 0.073(6) 0.069(6) 0.038(5) -0.003(4) 0.004(4) -0.034(5)
C1B 0.044(5) 0.075(7) 0.030(5) -0.009(5) 0.005(4) -0.012(5)
C2B 0.046(6) 0.076(8) 0.053(6) 0.015(6) 0.003(5) -0.001(5)
C3B 0.048(6) 0.072(7) 0.055(6) 0.009(6) 0.009(5) 0.002(5)
C4B 0.067(7) 0.060(6) 0.046(6) -0.012(5) -0.001(5) 0.011(6)
C5B 0.049(6) 0.078(8) 0.080(8) -0.025(7) -0.004(6) 0.036(6)
C6B 0.023(5) 0.083(8) 0.080(8) -0.017(7) 0.012(5) 0.001(5)
C7B 0.149(14) 0.049(7) 0.087(10) 0.006(7) -0.033(10) 0.029(8)

_geom_special_details            
; 
 All esds (except the esd in the dihedral angle between two l.s. planes) 
 are estimated using the full covariance matrix.  The cell esds are taken 
 into account individually in the estimation of esds in distances, angles 
 and torsion angles; correlations between esds in cell parameters are only 
 used when they are defined by crystal symmetry.  An approximate (isotropic) 
 treatment of cell esds is used for estimating esds involving l.s. planes. 
;

loop_
_geom_bond_atom_site_label_1
_geom_bond_atom_site_label_2
_geom_bond_distance
_geom_bond_site_symmetry_2
_geom_bond_publ_flag
Au1 Cl1 2.273(2) . ?
Au1 Cl3 2.273(2) . ?
Au1 Cl4 2.276(2) . ?
Au1 Cl2 2.282(3) . ?
Au2 Cl6 2.272(2) . ?
Au2 Cl8 2.2733(19) . ?
Au2 Cl5 2.274(2) . ?
Au2 Cl7 2.283(3) . ?
Au3 Cl12 2.263(2) . ?
Au3 Cl9 2.277(3) . ?
Au3 Cl10 2.281(2) . ?
Au3 Cl11 2.283(2) . ?
N1 N2 1.083(12) . ?
N2 C1 1.410(12) . ?
C1 C2 1.375(13) . ?
C1 C6 1.380(13) . ?
C2 C3 1.328(15) . ?
C2 H2 0.9500 . ?
C3 C4 1.385(14) . ?
C3 H3 0.9500 . ?
C4 C5 1.381(14) . ?
C4 C7 1.540(15) . ?
C5 C6 1.386(14) . ?
C5 H5 0.9500 . ?
C6 H6 0.9500 . ?
C7 C8 1.450(16) . ?
C7 H7A 0.9900 . ?
C7 H7B 0.9900 . ?
C8 C9 1.540(16) . ?
C8 H8A 0.9900 . ?
C8 H8B 0.9900 . ?
C9 C10 1.477(17) . ?
C9 H9A 0.9900 . ?
C9 H9B 0.9900 . ?
C10 C11 1.520(16) . ?
C10 H10A 0.9900 . ?
C10 H10B 0.9900 . ?
C11 C12 1.512(18) . ?
C11 H11A 0.9900 . ?
C11 H11B 0.9900 . ?
C12 H12A 0.9800 . ?
C12 H12B 0.9800 . ?
C12 H12C 0.9800 . ?
N1A N2A 1.086(11) . ?
N2A C1A 1.400(12) . ?
C1A C6A 1.400(13) . ?
C1A C2A 1.401(13) . ?
C2A C3A 1.364(14) . ?
C2A H2A 0.9500 . ?
C3A C4A 1.365(13) . ?
C3A H3A 0.9500 . ?
C4A C5A 1.385(13) . ?
C4A C7A 1.508(13) . ?
C5A C6A 1.354(14) . ?
C5A H5A 0.9500 . ?
C6A H6A 0.9500 . ?
C7A C8A 1.518(14) . ?
C7A H7A1 0.9900 . ?
C7A H7A2 0.9900 . ?
C8A C9A 1.518(16) . ?
C8A H8A1 0.9900 . ?
C8A H8A2 0.9900 . ?
C9A C10A 1.496(18) . ?
C9A H9A1 0.9900 . ?
C9A H9A2 0.9900 . ?
C10A C11A 1.56(2) . ?
C10A H10C 0.9900 . ?
C10A H10D 0.9900 . ?
C11A C12A 1.47(3) . ?
C11A H11C 0.9900 . ?
C11A H11D 0.9900 . ?
C12A H12D 0.9800 . ?
C12A H12E 0.9800 . ?
C12A H12F 0.9800 . ?
N1B N2B 1.078(15) . ?
N2B C1B 1.391(15) . ?
C1B C2B 1.367(16) . ?
C1B C6B 1.384(16) . ?
C2B C3B 1.395(17) . ?
C2B H2B 0.9500 . ?
C3B C4B 1.371(17) . ?
C3B H3B 0.9500 . ?
C4B C5B 1.391(18) . ?
C4B C7B 1.500(19) . ?
C5B C6B 1.360(19) . ?
C5B H5B 0.9500 . ?
C6B H6B 0.9500 . ?
C7B C8C 1.53(3) . ?
C7B C8B 1.54(4) . ?
C7B H7B1 0.9900 . ?
C7B H7B2 0.9900 . ?
C8B C9B 1.47(7) . ?
C8B H8BA 0.9900 . ?
C8B H8BB 0.9900 . ?
C9B C10B 1.41(7) . ?
C9B H9BA 0.9900 . ?
C9B H9BB 0.9900 . ?
C10B C11B 1.33(7) . ?
C10B H10E 0.9900 . ?
C10B H10F 0.9900 . ?
C11B C12B 1.76(9) . ?
C11B H11E 0.9900 . ?
C11B H11F 0.9900 . ?
C12B H12G 0.9800 . ?
C12B H12H 0.9800 . ?
C12B H12I 0.9800 . ?
C8C C9C 1.55(4) . ?
C8C H8CA 0.9900 . ?
C8C H8CB 0.9900 . ?
C9C C10C 1.32(9) . ?
C9C H9CA 0.9900 . ?
C9C H9CB 0.9900 . ?
C10C C11C 1.71(9) . ?
C10C H10G 0.9900 . ?
C10C H10H 0.9900 . ?
C11C C12C 0.78(8) . ?
C11C H11G 0.9900 . ?
C11C H11H 0.9900 . ?
C12C H12J 0.9800 . ?
C12C H12K 0.9800 . ?
C12C H12L 0.9800 . ?

loop_
_geom_angle_atom_site_label_1
_geom_angle_atom_site_label_2
_geom_angle_atom_site_label_3
_geom_angle
_geom_angle_site_symmetry_1
_geom_angle_site_symmetry_3
_geom_angle_publ_flag
Cl1 Au1 Cl3 179.14(11) . . ?
Cl1 Au1 Cl4 89.34(9) . . ?
Cl3 Au1 Cl4 90.70(9) . . ?
Cl1 Au1 Cl2 91.62(9) . . ?
Cl3 Au1 Cl2 88.37(9) . . ?
Cl4 Au1 Cl2 178.30(11) . . ?
Cl6 Au2 Cl8 178.85(9) . . ?
Cl6 Au2 Cl5 89.03(9) . . ?
Cl8 Au2 Cl5 90.01(8) . . ?
Cl6 Au2 Cl7 90.60(10) . . ?
Cl8 Au2 Cl7 90.36(9) . . ?
Cl5 Au2 Cl7 178.94(10) . . ?
Cl12 Au3 Cl9 90.28(10) . . ?
Cl12 Au3 Cl10 179.34(10) . . ?
Cl9 Au3 Cl10 90.11(9) . . ?
Cl12 Au3 Cl11 89.71(9) . . ?
Cl9 Au3 Cl11 177.58(10) . . ?
Cl10 Au3 Cl11 89.93(8) . . ?
N1 N2 C1 177.9(10) . . ?
C2 C1 C6 124.3(10) . . ?
C2 C1 N2 118.4(9) . . ?
C6 C1 N2 117.3(8) . . ?
C3 C2 C1 117.7(10) . . ?
C3 C2 H2 121.2 . . ?
C1 C2 H2 121.2 . . ?
C2 C3 C4 121.7(9) . . ?
C2 C3 H3 119.1 . . ?
C4 C3 H3 119.1 . . ?
C5 C4 C3 119.5(9) . . ?
C5 C4 C7 121.5(9) . . ?
C3 C4 C7 119.0(9) . . ?
C4 C5 C6 120.7(9) . . ?
C4 C5 H5 119.6 . . ?
C6 C5 H5 119.6 . . ?
C1 C6 C5 115.9(9) . . ?
C1 C6 H6 122.1 . . ?
C5 C6 H6 122.1 . . ?
C8 C7 C4 115.0(10) . . ?
C8 C7 H7A 108.5 . . ?
C4 C7 H7A 108.5 . . ?
C8 C7 H7B 108.5 . . ?
C4 C7 H7B 108.5 . . ?
H7A C7 H7B 107.5 . . ?
C7 C8 C9 112.4(10) . . ?
C7 C8 H8A 109.1 . . ?
C9 C8 H8A 109.1 . . ?
C7 C8 H8B 109.1 . . ?
C9 C8 H8B 109.1 . . ?
H8A C8 H8B 107.9 . . ?
C10 C9 C8 116.4(11) . . ?
C10 C9 H9A 108.2 . . ?
C8 C9 H9A 108.2 . . ?
C10 C9 H9B 108.2 . . ?
C8 C9 H9B 108.2 . . ?
H9A C9 H9B 107.3 . . ?
C9 C10 C11 114.6(11) . . ?
C9 C10 H10A 108.6 . . ?
C11 C10 H10A 108.6 . . ?
C9 C10 H10B 108.6 . . ?
C11 C10 H10B 108.6 . . ?
H10A C10 H10B 107.6 . . ?
C12 C11 C10 113.4(11) . . ?
C12 C11 H11A 108.9 . . ?
C10 C11 H11A 108.9 . . ?
C12 C11 H11B 108.9 . . ?
C10 C11 H11B 108.9 . . ?
H11A C11 H11B 107.7 . . ?
C11 C12 H12A 109.5 . . ?
C11 C12 H12B 109.5 . . ?
H12A C12 H12B 109.5 . . ?
C11 C12 H12C 109.5 . . ?
H12A C12 H12C 109.5 . . ?
H12B C12 H12C 109.5 . . ?
N1A N2A C1A 178.7(9) . . ?
C6A C1A N2A 118.2(8) . . ?
C6A C1A C2A 123.7(8) . . ?
N2A C1A C2A 118.1(9) . . ?
C3A C2A C1A 115.6(9) . . ?
C3A C2A H2A 122.2 . . ?
C1A C2A H2A 122.2 . . ?
C2A C3A C4A 122.7(9) . . ?
C2A C3A H3A 118.7 . . ?
C4A C3A H3A 118.7 . . ?
C3A C4A C5A 119.7(8) . . ?
C3A C4A C7A 121.5(8) . . ?
C5A C4A C7A 118.8(8) . . ?
C6A C5A C4A 121.5(8) . . ?
C6A C5A H5A 119.2 . . ?
C4A C5A H5A 119.2 . . ?
C5A C6A C1A 116.8(8) . . ?
C5A C6A H6A 121.6 . . ?
C1A C6A H6A 121.6 . . ?
C4A C7A C8A 111.8(8) . . ?
C4A C7A H7A1 109.3 . . ?
C8A C7A H7A1 109.3 . . ?
C4A C7A H7A2 109.3 . . ?
C8A C7A H7A2 109.3 . . ?
H7A1 C7A H7A2 107.9 . . ?
C9A C8A C7A 113.1(10) . . ?
C9A C8A H8A1 109.0 . . ?
C7A C8A H8A1 109.0 . . ?
C9A C8A H8A2 109.0 . . ?
C7A C8A H8A2 109.0 . . ?
H8A1 C8A H8A2 107.8 . . ?
C10A C9A C8A 114.4(11) . . ?
C10A C9A H9A1 108.7 . . ?
C8A C9A H9A1 108.7 . . ?
C10A C9A H9A2 108.7 . . ?
C8A C9A H9A2 108.7 . . ?
H9A1 C9A H9A2 107.6 . . ?
C9A C10A C11A 112.8(12) . . ?
C9A C10A H10C 109.0 . . ?
C11A C10A H10C 109.0 . . ?
C9A C10A H10D 109.0 . . ?
C11A C10A H10D 109.0 . . ?
H10C C10A H10D 107.8 . . ?
C12A C11A C10A 113.2(17) . . ?
C12A C11A H11C 108.9 . . ?
C10A C11A H11C 108.9 . . ?
C12A C11A H11D 108.9 . . ?
C10A C11A H11D 108.9 . . ?
H11C C11A H11D 107.8 . . ?
C11A C12A H12D 109.5 . . ?
C11A C12A H12E 109.5 . . ?
H12D C12A H12E 109.5 . . ?
C11A C12A H12F 109.5 . . ?
H12D C12A H12F 109.5 . . ?
H12E C12A H12F 109.5 . . ?
N1B N2B C1B 178.0(12) . . ?
C2B C1B C6B 125.2(11) . . ?
C2B C1B N2B 116.7(11) . . ?
C6B C1B N2B 118.2(10) . . ?
C1B C2B C3B 115.0(11) . . ?
C1B C2B H2B 122.5 . . ?
C3B C2B H2B 122.5 . . ?
C4B C3B C2B 122.8(11) . . ?
C4B C3B H3B 118.6 . . ?
C2B C3B H3B 118.6 . . ?
C3B C4B C5B 118.5(11) . . ?
C3B C4B C7B 120.3(13) . . ?
C5B C4B C7B 121.2(13) . . ?
C6B C5B C4B 121.6(11) . . ?
C6B C5B H5B 119.2 . . ?
C4B C5B H5B 119.2 . . ?
C5B C6B C1B 117.0(11) . . ?
C5B C6B H6B 121.5 . . ?
C1B C6B H6B 121.5 . . ?
C4B C7B C8C 102.7(16) . . ?
C4B C7B C8B 120.4(19) . . ?
C8C C7B C8B 36.6(16) . . ?
C4B C7B H7B1 107.2 . . ?
C8C C7B H7B1 84.5 . . ?
C8B C7B H7B1 107.2 . . ?
C4B C7B H7B2 107.2 . . ?
C8C C7B H7B2 142.7 . . ?
C8B C7B H7B2 107.2 . . ?
H7B1 C7B H7B2 106.9 . . ?
C9B C8B C7B 113(4) . . ?
C9B C8B H8BA 108.9 . . ?
C7B C8B H8BA 108.9 . . ?
C9B C8B H8BB 108.9 . . ?
C7B C8B H8BB 108.9 . . ?
H8BA C8B H8BB 107.7 . . ?
C10B C9B C8B 133(5) . . ?
C10B C9B H9BA 104.1 . . ?
C8B C9B H9BA 104.1 . . ?
C10B C9B H9BB 104.1 . . ?
C8B C9B H9BB 104.1 . . ?
H9BA C9B H9BB 105.5 . . ?
C11B C10B C9B 135(5) . . ?
C11B C10B H10E 103.4 . . ?
C9B C10B H10E 103.4 . . ?
C11B C10B H10F 103.4 . . ?
C9B C10B H10F 103.4 . . ?
H10E C10B H10F 105.2 . . ?
C10B C11B C12B 154(5) . . ?
C10B C11B H11E 97.8 . . ?
C12B C11B H11E 97.8 . . ?
C10B C11B H11F 97.8 . . ?
C12B C11B H11F 97.8 . . ?
H11E C11B H11F 103.7 . . ?
C11B C12B H12G 109.5 . . ?
C11B C12B H12H 109.5 . . ?
H12G C12B H12H 109.5 . . ?
C11B C12B H12I 109.5 . . ?
H12G C12B H12I 109.5 . . ?
H12H C12B H12I 109.5 . . ?
C7B C8C C9C 114(2) . . ?
C7B C8C H8CA 108.8 . . ?
C9C C8C H8CA 108.8 . . ?
C7B C8C H8CB 108.8 . . ?
C9C C8C H8CB 108.8 . . ?
H8CA C8C H8CB 107.7 . . ?
C10C C9C C8C 123(5) . . ?
C10C C9C H9CA 106.7 . . ?
C8C C9C H9CA 106.7 . . ?
C10C C9C H9CB 106.7 . . ?
C8C C9C H9CB 106.7 . . ?
H9CA C9C H9CB 106.6 . . ?
C9C C10C C11C 118(6) . . ?
C9C C10C H10G 107.8 . . ?
C11C C10C H10G 107.8 . . ?
C9C C10C H10H 107.8 . . ?
C11C C10C H10H 107.8 . . ?
H10G C10C H10H 107.1 . . ?
C12C C11C C10C 124(9) . . ?
C12C C11C H11G 106.4 . . ?
C10C C11C H11G 106.4 . . ?
C12C C11C H11H 106.4 . . ?
C10C C11C H11H 106.4 . . ?
H11G C11C H11H 106.5 . . ?
C11C C12C H12J 109.5 . . ?
C11C C12C H12K 109.5 . . ?
H12J C12C H12K 109.5 . . ?
C11C C12C H12L 109.5 . . ?
H12J C12C H12L 109.5 . . ?
H12K C12C H12L 109.5 . . ?

loop_
_geom_torsion_atom_site_label_1
_geom_torsion_atom_site_label_2
_geom_torsion_atom_site_label_3
_geom_torsion_atom_site_label_4
_geom_torsion
_geom_torsion_site_symmetry_1
_geom_torsion_site_symmetry_2
_geom_torsion_site_symmetry_3
_geom_torsion_site_symmetry_4
_geom_torsion_publ_flag
N1 N2 C1 C2 -64(28) . . . . ?
N1 N2 C1 C6 115(27) . . . . ?
C6 C1 C2 C3 3.5(16) . . . . ?
N2 C1 C2 C3 -177.4(9) . . . . ?
C1 C2 C3 C4 0.7(16) . . . . ?
C2 C3 C4 C5 -3.6(17) . . . . ?
C2 C3 C4 C7 174.8(11) . . . . ?
C3 C4 C5 C6 2.5(17) . . . . ?
C7 C4 C5 C6 -175.8(11) . . . . ?
C2 C1 C6 C5 -4.4(16) . . . . ?
N2 C1 C6 C5 176.5(9) . . . . ?
C4 C5 C6 C1 1.2(16) . . . . ?
C5 C4 C7 C8 -40.6(17) . . . . ?
C3 C4 C7 C8 141.1(12) . . . . ?
C4 C7 C8 C9 -175.5(10) . . . . ?
C7 C8 C9 C10 -178.5(12) . . . . ?
C8 C9 C10 C11 -174.0(12) . . . . ?
C9 C10 C11 C12 -174.1(13) . . . . ?
N1A N2A C1A C6A -92(46) . . . . ?
N1A N2A C1A C2A 86(46) . . . . ?
C6A C1A C2A C3A 0.6(14) . . . . ?
N2A C1A C2A C3A -176.9(8) . . . . ?
C1A C2A C3A C4A -0.8(14) . . . . ?
C2A C3A C4A C5A 1.3(14) . . . . ?
C2A C3A C4A C7A 179.3(9) . . . . ?
C3A C4A C5A C6A -1.7(14) . . . . ?
C7A C4A C5A C6A -179.7(9) . . . . ?
C4A C5A C6A C1A 1.5(14) . . . . ?
N2A C1A C6A C5A 176.6(8) . . . . ?
C2A C1A C6A C5A -1.0(14) . . . . ?
C3A C4A C7A C8A 108.0(11) . . . . ?
C5A C4A C7A C8A -74.1(11) . . . . ?
C4A C7A C8A C9A 170.2(9) . . . . ?
C7A C8A C9A C10A -178.0(11) . . . . ?
C8A C9A C10A C11A 68.3(18) . . . . ?
C9A C10A C11A C12A 179.2(19) . . . . ?
N1B N2B C1B C2B -100(42) . . . . ?
N1B N2B C1B C6B 79(42) . . . . ?
C6B C1B C2B C3B -1.1(19) . . . . ?
N2B C1B C2B C3B 177.4(10) . . . . ?
C1B C2B C3B C4B 2.6(19) . . . . ?
C2B C3B C4B C5B -2.3(19) . . . . ?
C2B C3B C4B C7B 177.1(12) . . . . ?
C3B C4B C5B C6B 0.5(19) . . . . ?
C7B C4B C5B C6B -178.9(12) . . . . ?
C4B C5B C6B C1B 0.9(19) . . . . ?
C2B C1B C6B C5B -0.6(19) . . . . ?
N2B C1B C6B C5B -179.1(11) . . . . ?
C3B C4B C7B C8C -102.8(18) . . . . ?
C5B C4B C7B C8C 76.6(19) . . . . ?
C3B C4B C7B C8B -68(2) . . . . ?
C5B C4B C7B C8B 111(2) . . . . ?
C4B C7B C8B C9B -79(4) . . . . ?
C8C C7B C8B C9B -11(4) . . . . ?
C7B C8B C9B C10B -151(6) . . . . ?
C8B C9B C10B C11B 44(11) . . . . ?
C9B C10B C11B C12B -36(17) . . . . ?
C4B C7B C8C C9C -170(2) . . . . ?
C8B C7B C8C C9C 66(3) . . . . ?
C7B C8C C9C C10C -179(5) . . . . ?
C8C C9C C10C C11C -159(4) . . . . ?
C9C C10C C11C C12C 6(14) . . . . ?

_diffrn_measured_fraction_theta_max 0.985
_diffrn_reflns_theta_full        67.95
_diffrn_measured_fraction_theta_full 0.985
_refine_diff_density_max         3.336
_refine_diff_density_min         -2.197
_refine_diff_density_rms         0.252

#===END
